# Supplementary material for: Controlled Growth of Silver Oxide Nanoparticles on the Surface of Citrate Anion Intercalated Layered Double Hydroxide
Source: PubMed Central journal article supplement (PMC7916874; doi:10.3390/nano11020455), 2021-02-11
Supplement: nanomaterials-11-00455-s001.pdf [file nanomaterials-11-00455-s001.pdf]

# Supplementary Materials: Controlled Growth of Silver Oxide Nanoparticles on the Surface of Citrate Anion Intercalated Layered Double Hydroxide

Do-Gak Jeung <sup>1</sup>, Minseop Lee <sup>2</sup>, Seung-Min Paek <sup>2,\*</sup> and Jae-Min Oh <sup>1,\*</sup>

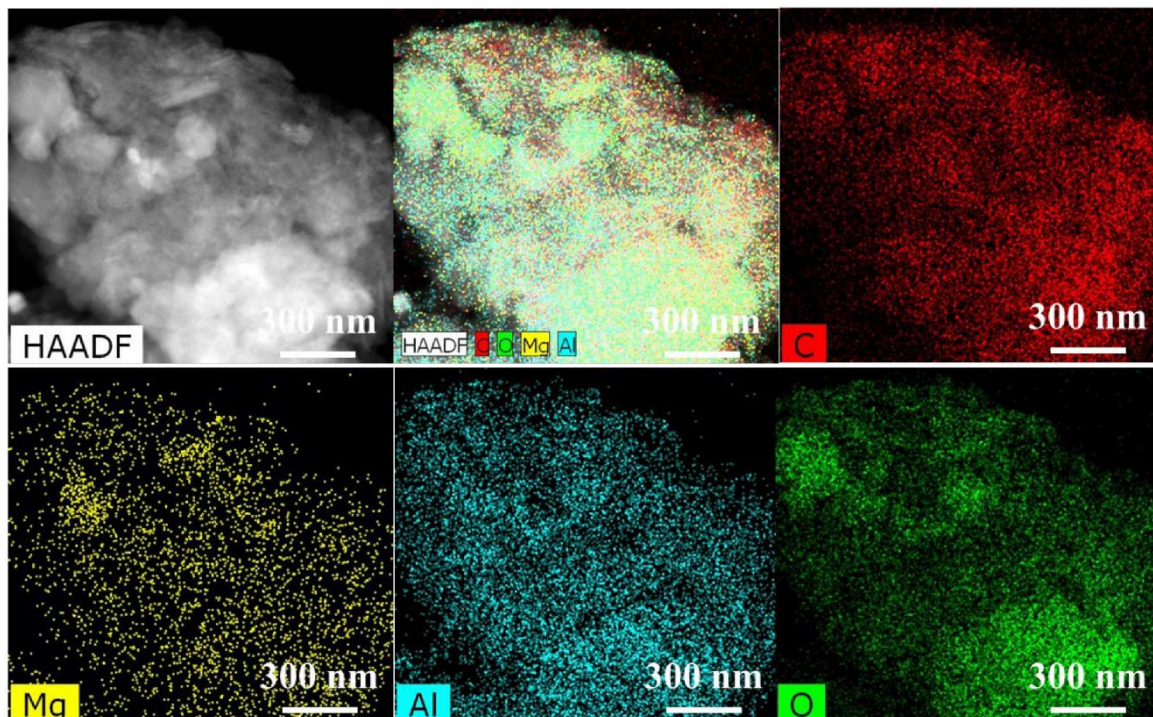

**Figure S1.** High-angle annular dark-field (HAADF) and TEM energy dispersive spectroscopic (EDS) mapping images of pristine MgAl-citrate LDH.

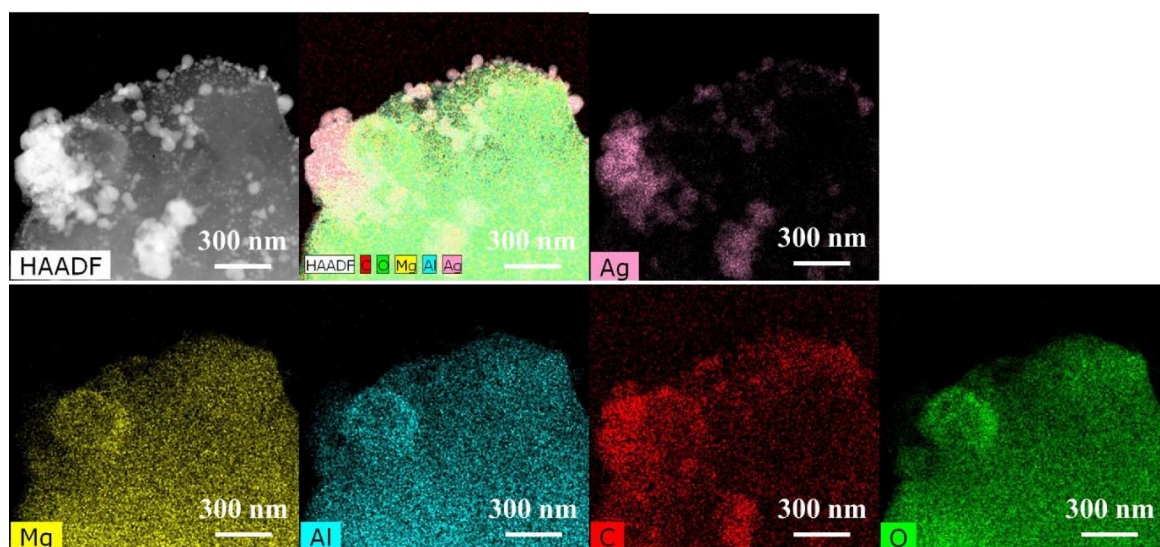

**Figure S2.** High-angle annular dark-field (HAADF) and TEM energy dispersive spectroscopic (EDS) mapping images of SONP@LDH-1.



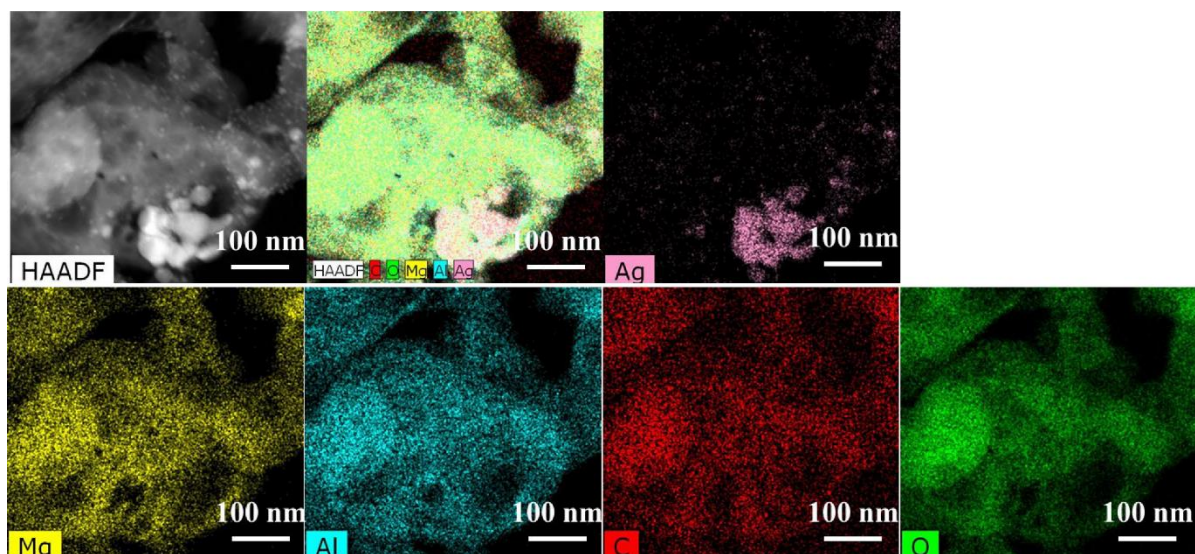

**Figure S3.** High-angle annular dark-field (HAADF) and TEM energy dispersive spectroscopic (EDS) mapping images of SONP@LDH-1/3.

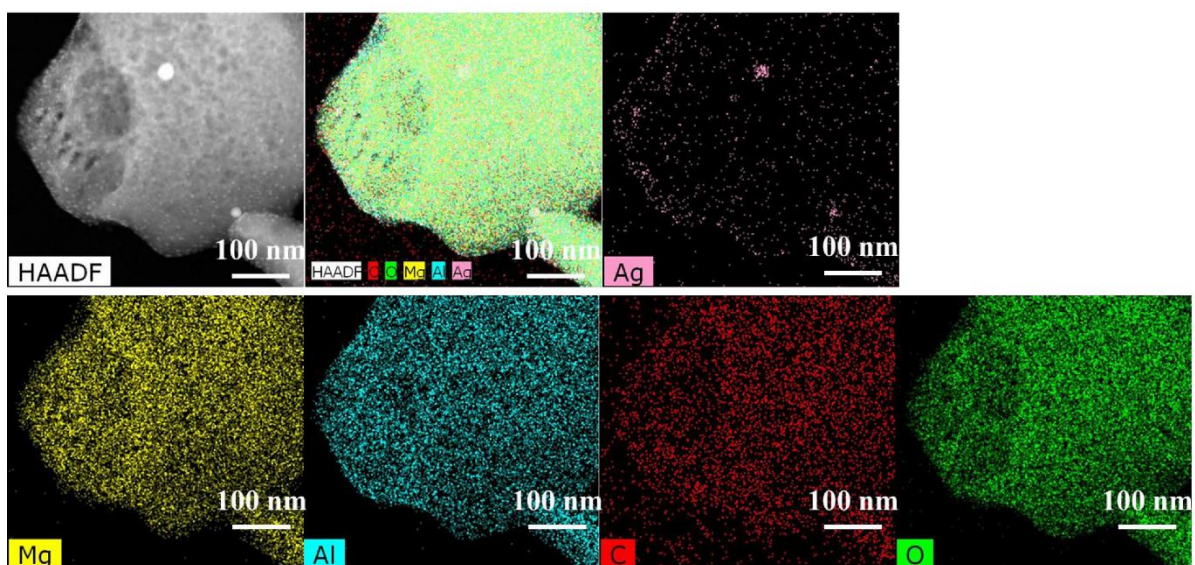

**Figure S4.** High-angle annular dark-field (HAADF) and TEM energy dispersive spectroscopic (EDS) mapping images of SONP@LDH-1/10.

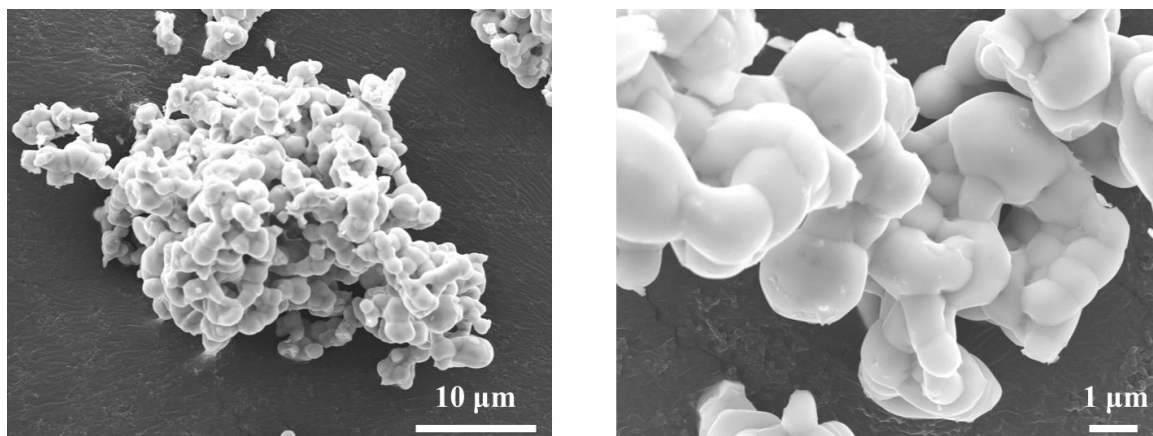

**Figure S5.** Field emission-scanning electron microscopy images of bulk Ag<sub>2</sub>O.



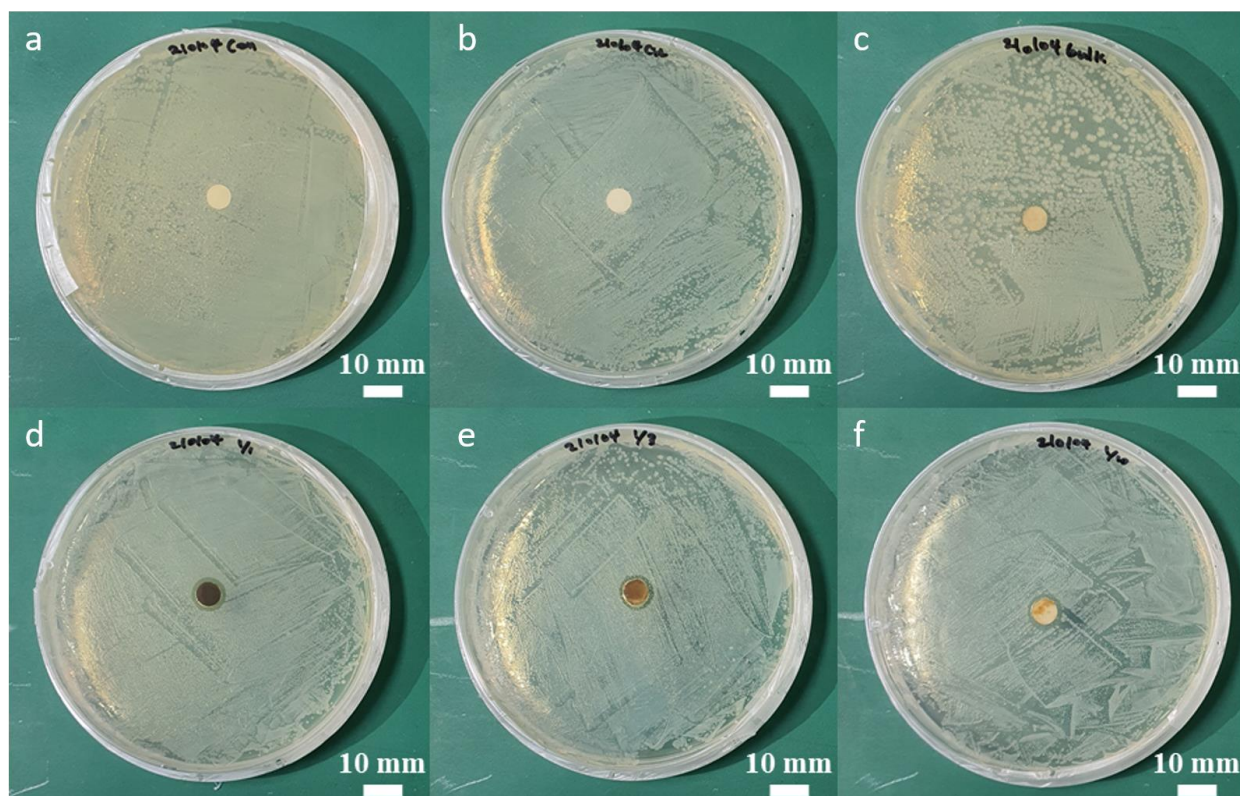

**Figure S6.** Optical images of zone of inhibition assay for (a) negative control, (b) pristine MgAl-citrate LDH, (c) bulk Ag<sub>2</sub>O, (d) SONP@LDH-1, (e) SONP@LDH-1/3 and (f) SONP@LDH-1/10 containing paper on LB agar plates incubated at 37 °C, 24 h. Each paper is 6 mm in diameter.

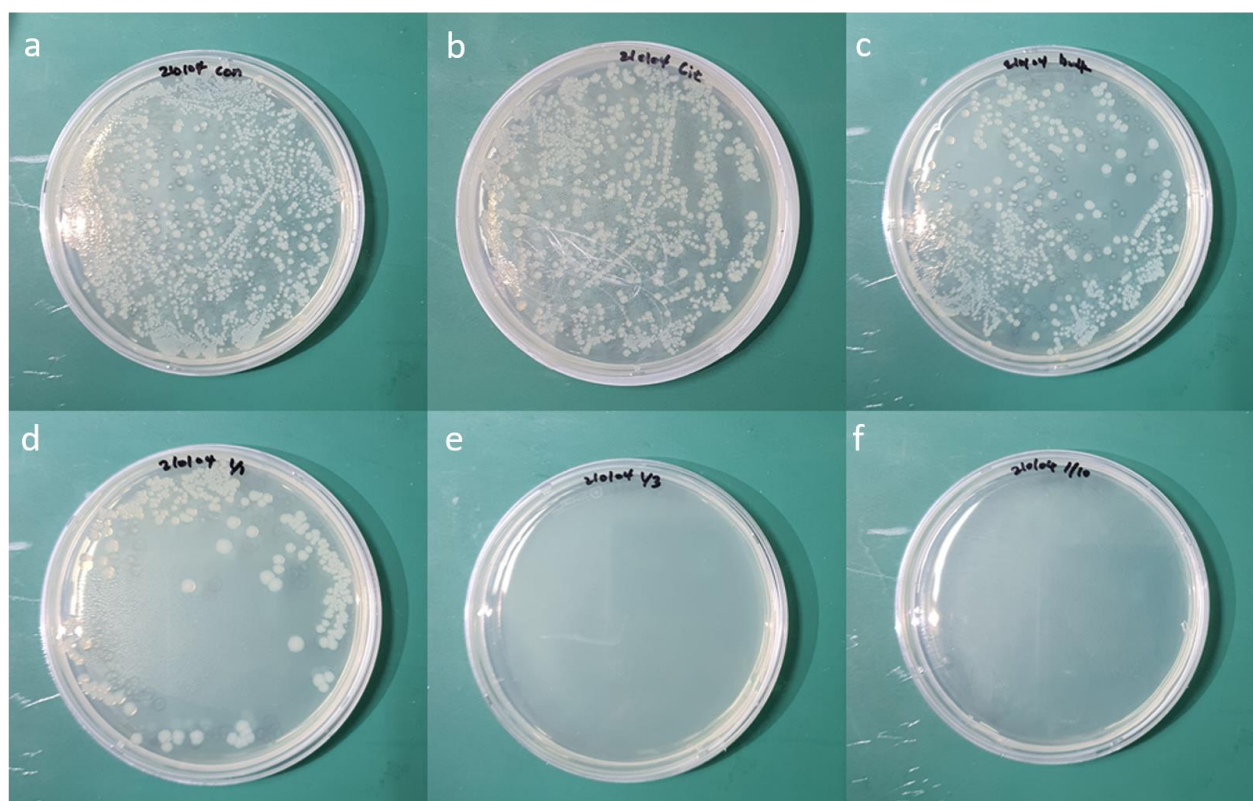

**Figure S7.** Optical images of colony forming unit test assay for (a) negative control, (b) pristine MgAl-citrate LDH, (c) bulk Ag<sub>2</sub>O, (d) SONP@LDH-1, (e) SONP@LDH-1/3 and (f) SONP@LDH-1/10 on LB agar plates incubated at 37 °C, 24 h.
